# Supplementary material
Source: PubMed Central journal article supplement (PMC4498063)
Supplement: supp_M115.655605_jbc.M115.655605-1.pdf [file supp_M115.655605_jbc.M115.655605-1.pdf]

**Table S1. Primers for qPCR**

| <b>Target</b>         | <b>Reference</b> | <b>Sequence</b>                                          |
|-----------------------|------------------|----------------------------------------------------------|
| <i>Xenopus laevis</i> |                  |                                                          |
| <i>bra</i>            | New              | U: TCACCAAGAATGGAAGACGAAT<br>D: CCACAAAGTCCAGCAGAACC     |
| <i>bicc</i>           | New              | U: CCAGACCCCAACTCTCCCA<br>D: CTCACTATAACAGTAGCACCGT      |
| <i>chrd</i>           | (1)              | U: AACTGCCAGGACTGGATGGT<br>D: GGCAGGATTTAGAGTTGCTTC      |
| <i>edd</i>            | New              | U: GCGGTGGCTTCTCGTCAACT<br>D: GACTGTGGCTGTGTAATCCC       |
| <i>ek</i>             | New              | U: CAGAATCCTCATCAACATCCA<br>D: ACAACCTTCCCATCAACCACC     |
| <i>gsc</i>            | New              | U: TACCCTCAGCTACAGCATACG<br>D: TCCTGGACAAAGTGCCAACAT     |
| <i>derriere</i>       | (2)              | U: TGGCAGAGTTGTGGCTATCA<br>D: CTATGGCTGCTATGGTTCCTT      |
| <i>lim5</i>           | New              | U: CCAACAGACAGGCCCAAC<br>D: GTGGCTCCGGTGCTACAG           |
| <i>mixer</i>          | New              | U: AGGCACCCAGGAGAAAGTCAT<br>D: TTTGACGGTGAAGAGACAGGA     |
| <i>mix.1</i>          | New              | U: CAAAAGCCACCAAGCCCATT<br>D: TGCTGAAGGAAACATTGCC        |
| <i>msx1</i>           | New              | U: AAGAGGAGGGTCTGGTCAAGC<br>D: GGTGGGCTCATCCTTCTTGTT     |
| <i>odc</i>            | (3)              | U: GCCATTGTGAAGACTCTCTCCATTC<br>D: TTCGGGTGATTCCCTTGCCAC |
| <i>scp1</i>           | New              | U: TCGAGGGA ACTATGTGAAAGA<br>D: GATGGAAAATGTAGGAGGCTG    |
| <i>scp2</i>           | New              | U: AGATAGAAGGAACTACACACC<br>D: TGTCACTGGGTCGGCATACT      |
| <i>scp3</i>           | New              | U: AAAAGCAAAGGAACAGAAGCA<br>D: TAGTAGGTGGACTGGGAATGG     |
| <i>scpl2</i>          | New              | U: GTACGGACTGCTCGTTGTAAG<br>D: GTTCTTGCTTGGGCAGTTTG      |
| <i>sox2</i>           | New              | U: TAGTCACCTCTTCTCCCATTT<br>D: CGCTACTGAGGCACTCTGAT      |
| <i>sox17a</i>         | (4)              | U: GCAAGATGCTTGGCAAGTCG<br>D: GCTGAAGTTCTCTAGACACA       |

---

|               |     |                                                             |
|---------------|-----|-------------------------------------------------------------|
| <i>szl</i>    | New | U: CACACAAGACAGTCTTGGAAGCTTTC<br>D: CACCAGCAATAACATACTGTGGG |
| <i>vent1</i>  | New | U: AATGACACTGAACAAAGGGAG<br>D: AATGCCTGTTCCAGTTTGCTT        |
| <i>vent2</i>  | (5) | U: TGAGACTTGGGCACTGTCTG<br>D: CCTCTGTTGAATGGCTTGCT          |
| <i>wnt8</i>   | New | U: ACAAGAGGAAAATGAGGTCGG<br>D: TAAGCAATAATCGGGAGAGTC        |
| <i>Xnr1</i>   | New | U: CCAGATAGAGTAGAGAGCAGG<br>D: TCATTTCCCGTGACAAGATTC        |
| <b>Human</b>  |     |                                                             |
| <i>FST</i>    | New | U: ACGTGTGAGAACGTGGACTG<br>D: CACATTCATTGCGGTAGGTTTTTC      |
| <i>FURIN</i>  | New | U: CCTGGTTGCTATGGGTGGTAG<br>D: AAGTGGTAATAGTCCCCGAAGA       |
| <i>GAPDH</i>  | (6) | U: ACCACAGTCCATGCCATCAC<br>D: TCCACCACCCTGTTGCTGTA          |
| <i>ID1</i>    | (7) | U: TCAGCACCCCTCAACGGCGAG<br>D: GCAAGGATGGGACGGAAGTG         |
| <i>ID2</i>    | (8) | U: AGTCCCGTGAGGTCCGTTAG<br>D: AGTCGTTTCATGTTGTATAGCAGG      |
| <i>LEFTYA</i> | New | U: ATTGAGCCCTCTAACTGAACG<br>D: GCTTAGGATGGGTGATGGAC         |
| <i>PAI1</i>   | (6) | U: GAGACAGGCAGCTCGGATTC<br>D: GGCCTCCCAAAGTGCATTAC          |
| <i>SCP1</i>   | New | U: CCAGTCCAATACCTGCTCCC<br>D: GGACGCTTCAACACGTAGACC         |
| <i>SCP2</i>   | New | U: CGCCTATTCCGTGAGTCTTG<br>D: TGTCCAGGATGAGGGTCTTT          |
| <i>SCP3</i>   | New | U: GTGACGGTGCTTGACTATGG<br>D: GCCGCTTCAGCACATACACCT         |
| <i>SCPL2</i>  | New | U: CTTGATATGGAACAGGTGGAT<br>D: CTATCTGGAGTTACTGGTGCT        |
| <i>SMAD1</i>  | New | U: CCCCTGCCCTCAGAAATCAA<br>D: CATGGAACGCTTCACCCACA          |
| <i>SMAD2</i>  | New | U: CGTCCATCTTGCCATTCACG<br>D: CTCAAGCTCATCTAATCGTCCTG       |

---

## References for Table S1

1. Sasai, Y., Lu, B., Steinbeisser, H., Geissert, D., Gont, L. K., and De Robertis, E. M. (1994) Xenopus chordin: a novel dorsalizing factor activated by organizer-specific homeobox genes. *Cell* **79**, 779-790
2. Sun, B. I., Bush, S. M., Collins-Racie, L. A., LaVallie, E. R., DiBlasio-Smith, E. A., Wolfman, N. M., McCoy, J. M., and Sive, H. L. (1999) derriere: a TGF-beta family member required for posterior development in Xenopus. *Development* **126**, 1467-1482
3. Heasman, J., Kofron, M., and Wylie, C. (2000) Beta-catenin signaling activity dissected in the early Xenopus embryo: a novel antisense approach. *Dev. Biol.* **222**, 124-134
4. Xanthos, J. B., Kofron, M., Wylie, C., and Heasman, J. (2001) Maternal VegT is the initiator of a molecular network specifying endoderm in Xenopus laevis. *Development* **128**, 167-180
5. Shapira, E., Marom, K., Yelin, R., Levy, A., and Fainsod, A. (1999) A role for the homeobox gene Xvex-1 as part of the BMP-4 ventral signaling pathway. *Mech. Dev.* **86**, 99-111
6. Yan, X., Zhang, J., Pan, L., Wang, P., Xue, H., Zhang, L., Gao, X., Zhao, X., Ning, Y., and Chen, Y. G. (2011) TSC-22 promotes transforming growth factor beta-mediated cardiac myofibroblast differentiation by antagonizing Smad7 activity. *Mol. Cell. Biol.* **31**, 3700-3709
7. Zhang, J., Fei, T., Li, Z., Zhu, G., Wang, L., and Chen, Y. G. (2013) BMP induces cochlin expression to facilitate self-renewal and suppress neural differentiation of mouse embryonic stem cells. *J. Biol. Chem.* **288**, 8053-8060
8. Ni, F., Sun, R., Fu, B., Wang, F., Guo, C., Tian, Z., and Wei, H. (2013) IGF-1 promotes the development and cytotoxic activity of human NK cells. *Nat. Commun.* **4**, 1479
