# Supplementary material
Source: PubMed Central journal article supplement (PMC4498063)
Supplement: supp_M115.655605_jbc.M115.655605-2.pdf [file supp_M115.655605_jbc.M115.655605-2.pdf]

**Table S2. Maternal transcripts significantly enriched in the vegetal region**

| RefSeq ID      | Name                   | Function                                                | A1*    | A2     | V1     | V2     | Fold change | FDR      |
|----------------|------------------------|---------------------------------------------------------|--------|--------|--------|--------|-------------|----------|
| NM_001089043.1 | <i>germs</i> (1)       | components of the germ plasm                            | 1.94   | 1.55   | 140.45 | 137.29 | 79.16       | 3.43E-23 |
| NM_001088548.1 | <i>ddx25</i> (2)       | ATP-dependent RNA helicase                              | 5.10   | 7.25   | 255.84 | 339.22 | 48.46       | 8.27E-20 |
| NM_001087463.1 | <i>pgat</i> (3)        | germ plasm formation, positioning and maintenance       | 2.18   | 3.05   | 117.18 | 132.15 | 48.12       | 1.24E-19 |
| NM_001088303.1 | <i>dazl</i> (4)        | RNA-binding                                             | 2.66   | 3.56   | 60.26  | 81.20  | 22.81       | 5.62E-13 |
| NM_001092998.1 | <i>pcsk6</i> (5)       | protease; proprotein convertase                         | 9.65   | 10.85  | 147.78 | 119.63 | 13.16       | 9.43E-10 |
| NM_001095880.1 | <i>cnppd1</i>          | cyclin                                                  | 8.81   | 9.59   | 101.51 | 108.35 | 11.42       | 9.73E-09 |
| NM_001088196.1 | <i>vegt-a</i> (6)      | T-box transcription factor, meso-endodermal determinant | 73.00  | 47.87  | 565.45 | 607.31 | 9.56        | 6.69E-08 |
| NM_001091117.1 | <i>trim36</i> (7)      | zinc finger protein                                     | 4.82   | 4.64   | 43.40  | 68.48  | 11.70       | 8.55E-08 |
| NM_001087171.1 | <i>gk</i>              | ribulose kinase and related carbohydrate kinases        | 3.09   | 4.54   | 32.95  | 47.78  | 10.64       | 1.54E-07 |
| NM_001086974.1 | <i>acs11</i> (8,9)     | fatty acid CoA ligase                                   | 10.93  | 5.97   | 86.42  | 73.91  | 9.34        | 1.69E-07 |
| NM_001094076.1 | <i>rn3-b</i> (8)       | reticulum                                               | 1.53   | 2.29   | 43.98  | 78.70  | 32.23       | 9.87E-07 |
| NM_001086456.1 | <i>snai1</i> (10)      | zinc finger protein                                     | 7.67   | 2.89   | 50.58  | 42.25  | 8.56        | 1.80E-06 |
| NM_001095591.1 | <i>vg1</i> (11,12)     | TGF-beta related peptide                                | 21.63  | 15.83  | 508.78 | 344.14 | 22.72       | 1.80E-06 |
| NM_001088202.1 | <i>vegt-b</i> (6)      | T-box transcription factor, meso-endodermal determinant | 37.86  | 37.00  | 236.10 | 288.17 | 6.97        | 7.76E-06 |
| NM_001093953.1 | <i>syntabulin</i> (13) | nucleolar GTPase/ATPase                                 | 0.65   | 0.72   | 7.68   | 8.10   | 11.59       | 1.12E-05 |
| NM_001094985.1 | <i>lsm4</i>            | small nuclear ribonucleoprotein                         | 3.88   | 5.33   | 32.27  | 41.46  | 8.05        | 1.24E-05 |
| NM_001091230.1 | MGC81075 (8)           | Trim-like protein                                       | 13.72  | 9.85   | 84.80  | 72.58  | 6.63        | 2.07E-05 |
| NM_001090713.1 | <i>tob2</i> (8)        | transducer of ERBB2                                     | 5.22   | 3.85   | 26.83  | 36.48  | 6.87        | 3.57E-05 |
| NM_001091527.1 | <i>pgam1</i> (8)       | phosphoglycerate mutase                                 | 13.93  | 20.88  | 96.05  | 126.16 | 6.43        | 4.49E-05 |
| NM_001093074.1 | <i>spire1</i> (14)     | nucleolar GTPase/ATPase                                 | 25.65  | 14.32  | 133.87 | 103.02 | 5.85        | 7.21E-05 |
| NM_001087479.2 | <i>ephrin-b1</i> (15)  | ligand for Eph receptor tyrosine kinase                 | 3.59   | 3.73   | 29.83  | 29.94  | 8.17        | 1.01E-04 |
| NM_001085868.1 | <i>sox7</i> (16)       | HMG-box transcription factor                            | 10.38  | 5.57   | 82.17  | 58.29  | 8.70        | 1.06E-04 |
| NM_001093628.1 | <i>irf8</i>            | transcription factor                                    | 4.45   | 5.24   | 23.75  | 35.33  | 6.08        | 1.06E-04 |
| NM_001086196.1 | MGC53832 (8)           | long-chain-fatty-acid--CoA ligase 1-like                | 17.87  | 20.62  | 106.52 | 113.21 | 5.73        | 1.11E-04 |
| NM_001087540.1 | <i>otx1</i> (17)       | homeodomain transcription factor                        | 16.88  | 13.19  | 92.86  | 81.07  | 5.75        | 1.22E-04 |
| NM_001095090.1 | <i>bicc1-b</i> (18)    | KH domain RNA-binding protein                           | 12.79  | 10.51  | 68.36  | 55.25  | 5.30        | 3.54E-04 |
| NM_001088757.1 | <i>mf103</i>           | mediator of ubiquitin ligase activity                   | 6.74   | 6.53   | 40.87  | 31.88  | 5.50        | 3.70E-04 |
| NM_001095906.1 | <i>cdk5r2</i>          | CDK5 kinase activator                                   | 10.39  | 6.24   | 47.62  | 39.93  | 5.20        | 5.53E-04 |
| NM_001097913.1 | <i>grip2</i> (19,20)   | PDZ domain protein                                      | 2.90   | 1.16   | 263.41 | 130.22 | 95.55       | 9.06E-04 |
| NM_001095094.1 | <i>atp2a3</i> (8)      | Ca <sup>2+</sup> transporting ATPase                    | 5.31   | 6.86   | 28.49  | 30.63  | 4.89        | 1.11E-03 |
| NM_001088491.1 | <i>plin2</i> (21)      | vesicular trafficking                                   | 181.10 | 176.38 | 798.04 | 710.26 | 4.23        | 3.85E-03 |
| NM_001095736.1 | <i>dsc3</i>            | member of the cadherin gene superfamily                 | 23.09  | 20.48  | 107.36 | 78.61  | 4.28        | 4.42E-03 |

|                |                    |                                                        |       |       |        |        |       |          |
|----------------|--------------------|--------------------------------------------------------|-------|-------|--------|--------|-------|----------|
| NM_001086902.1 | <i>elovl1</i>      | ELOVL fatty acid elongase                              | 16.77 | 18.28 | 61.88  | 89.54  | 4.30  | 4.42E-03 |
| NM_001093340.1 | MGC82549           | sequence similar to PGAM1                              | 35.96 | 44.72 | 137.77 | 198.77 | 4.17  | 5.78E-03 |
| NM_001088034.1 | <i>nanos1</i> (22) | RNA binding                                            | 5.09  | 1.49  | 235.07 | 113.47 | 51.88 | 9.18E-03 |
| NM_001093266.1 | MGC81526           | sequence similar to tspan1, integral membrane protein  | 54.60 | 66.21 | 177.18 | 285.54 | 3.82  | 1.38E-02 |
| NM_001086025.1 | <i>acsbg2</i> (8)  | long-chain acyl-CoA synthetases                        | 40.03 | 32.67 | 144.06 | 132.11 | 3.78  | 1.43E-02 |
| NM_001090151.1 | <i>papola</i>      | poly(A) polymerase and related nucleotidyltransferases | 37.63 | 41.83 | 114.34 | 180.42 | 3.69  | 1.82E-02 |
| NM_001097902.1 | LOC100037213       | uncharacterized                                        | 27.47 | 26.06 | 102.19 | 99.87  | 3.77  | 1.97E-02 |
| NM_001090858.1 | <i>wnt11b</i> (23) | secreted protein, developmental regulator              | 14.89 | 9.04  | 137.52 | 83.38  | 9.18  | 2.38E-02 |
| NM_001092250.1 | <i>rm3-a</i> (8)   | reticulon                                              | 55.59 | 44.24 | 174.77 | 174.16 | 3.47  | 3.28E-02 |
| NM_001090817.1 | <i>scp3</i> (24)   | phosphatase                                            | 38.91 | 34.40 | 109.60 | 143.36 | 3.42  | 4.08E-02 |
| NM_001094823.1 | <i>aktip-b</i>     | ubiquitin-protein ligase                               | 45.07 | 45.94 | 132.91 | 179.87 | 3.42  | 4.38E-02 |

\*A: RPKM of samples from animal blastomeres; V: RPKM of samples from vegetal blastomeres

#### References for Table S2

1. Berekelya, L. A., Ponomarev, M. B., Luchinskaya, N. N., and Belyavsky, A. V. (2003) *Xenopus Germes* encodes a novel germ plasm-associated transcript. *Gene Expr. Patterns* **3**, 521-524
2. MacArthur, H., Houston, D. W., Bubunenko, M., Mosquera, L., and King, M. L. (2000) DEADSouth is a germ plasm specific DEAD-box RNA helicase in *Xenopus* related to eIF4A. *Mech. Dev.* **95**, 291-295
3. Hudson, C., and Woodland, H. R. (1998) Xpat, a gene expressed specifically in germ plasm and primordial germ cells of *Xenopus laevis*. *Mech. Dev.* **73**, 159-168
4. Houston, D. W., Zhang, J., Maines, J. Z., Wasserman, S. A., and King, M. L. (1998) A *Xenopus* DAZ-like gene encodes an RNA component of germ plasm and is a functional homologue of *Drosophila* boule. *Development* **125**, 171-180
5. Birsoy, B., Berg, L., Williams, P. H., Smith, J. C., Wylie, C. C., Christian, J. L., and Heasman, J. (2005) XPACE4 is a localized pro-protein convertase required for mesoderm induction and the cleavage of specific TGFbeta proteins in *Xenopus* development. *Development* **132**, 591-602
6. Stennard, F., Carnac, G., and Gurdon, J. B. (1996) The *Xenopus* T-box gene, Antipodean, encodes a vegetally localised maternal mRNA and can trigger mesoderm formation. *Development* **122**, 4179-4188
7. Yoshigai, E., Kawamura, S., Kuhara, S., and Tashiro, K. (2009) Trim36/Haprin plays a critical role in the arrangement of somites during *Xenopus* embryogenesis. *Biochem. Biophys. Res. Commun.* **378**, 428-432
8. Cuykendall, T. N., and Houston, D. W. (2010) Identification of germ plasm-associated transcripts by microarray analysis of *Xenopus* vegetal cortex RNA. *Dev. Dyn.* **239**, 1838-1848
9. Wang, H. W., Fang, J. S., Kuang, X., Miao, L. Y., Wang, C., Xia, G. L., King, M. L., and Zhang, J. (2012) Activity of long-chain acyl-CoA synthetase is required for maintaining meiotic arrest in *Xenopus laevis*. *Biol. Reprod.* **87**, 74
10. Sargent, M. G., and Bennett, M. F. (1990) Identification in *Xenopus* of a structural homologue of the *Drosophila* gene snail. *Development* **109**, 967-973
11. Melton, D. A. (1987) Translocation of a localized maternal mRNA to the vegetal pole of *Xenopus* oocytes. *Nature* **328**, 80-82
12. Weeks, D. L., and Melton, D. A. (1987) A maternal mRNA localized to the vegetal hemisphere in *Xenopus* eggs codes for a growth factor related to TGF-beta. *Cell* **51**, 861-867
13. Colozza, G., and De Robertis, E. M. (2014) Maternal syntabulin is required for dorsal axis formation and is a germ plasm component in *Xenopus*.

14. Le Goff, C., Laurent, V., Le Bon, K., Tanguy, G., Couturier, A., Le Goff, X., and Le Guellec, R. (2006) pEg6, a spire family member, is a maternal gene encoding a vegetally localized mRNA in *Xenopus* embryos. *Biol. Cell* **98**, 697-708
15. Betley, J. N., Frith, M. C., Graber, J. H., Choo, S., and Deshler, J. O. (2002) A ubiquitous and conserved signal for RNA localization in chordates. *Curr. Biol.* **12**, 1756-1761
16. Zhang, C., Basta, T., Fawcett, S. R., and Klymkowsky, M. W. (2005) SOX7 is an immediate-early target of VegT and regulates Nodal-related gene expression in *Xenopus*. *Dev. Biol.* **278**, 526-541
17. Pannese, M., Cagliani, R., Pardini, C. L., and Boncinelli, E. (2000) Xotx1 maternal transcripts are vegetally localized in *Xenopus laevis* oocytes. *Mech. Dev.* **90**, 111-114
18. Wessely, O., and De Robertis, E. M. (2000) The *Xenopus* homologue of Bicaudal-C is a localized maternal mRNA that can induce endoderm formation. *Development* **127**, 2053-2062
19. Kaneshiro, K., Miyauchi, M., Tanigawa, Y., Ikenishi, K., and Komiyama, T. (2007) The mRNA coding for *Xenopus* glutamate receptor interacting protein 2 (XGRIP2) is maternally transcribed, transported through the late pathway and localized to the germ plasm. *Biochem. Biophys. Res. Commun.* **355**, 902-906
20. Tarbashevich, K., Koebnick, K., and Pieler, T. (2007) XGRIP2.1 is encoded by a vegetally localizing, maternal mRNA and functions in germ cell development and anteroposterior PGC positioning in *Xenopus laevis*. *Dev. Biol.* **311**, 554-565
21. Chan, A. P., Kloc, M., and Etkin, L. D. (1999) fatyg encodes a new localized RNA that uses a 25-nucleotide element (FVLE1) to localize to the vegetal cortex of *Xenopus* oocytes. *Development* **126**, 4943-4953
22. Mosquera, L., Forristall, C., Zhou, Y., and King, M. L. (1993) A mRNA localized to the vegetal cortex of *Xenopus* oocytes encodes a protein with a nanos-like zinc finger domain. *Development* **117**, 377-386
23. Ku, M., and Melton, D. A. (1993) Xwnt-11: a maternally expressed *Xenopus* wnt gene. *Development* **119**, 1161-1173
24. Claussen, M., Horvay, K., and Pieler, T. (2004) Evidence for overlapping, but not identical, protein machineries operating in vegetal RNA localization along early and late pathways in *Xenopus* oocytes. *Development* **131**, 4263-4273
